# Supplementary material
Source: MDPI journal article supplement (https://www.mdpi.com/2254-9625/10/2/49)
Supplement: s1 [file s1]

# MESSAGE FRAMES

## GOVERNMENT AGENCY: USDA AND HHS

### *Gain Concrete*

The United States currently faces a growing public health concern with the obesity epidemic. Countless longitudinal studies have found a strong link between obesity and the development of chronic, non-communicable diseases such as heart disease, stroke, diabetes, and cancer, which are the biggest killers in developed nations.

The US Department of Agriculture (USDA) and Health and Human Services (HHS) believe that unhealthy eating is one of the leading causes of the obesity epidemic. The USDA and HHS recommend as a minimum 5 servings of fruits and vegetables, 2 servings of lean meat, and 6 servings of whole grains each day. They also suggest limiting saturated fats, added sugars, and sodium.

Adopting and maintaining a regular healthy eating plan will provide the following **BENEFITS** some time in the future:

- It will improve your heart's functioning, allowing it to effectively pump blood throughout your body
- It will allow you to get a good night's sleep, helping you feel energized during the day
- It will make you feel happier and increases your ability to cope with everyday stress
- It will keep your blood sugar levels in check, helping you lose weight.

### *Gain Abstract*

The United States currently faces a growing public health concern with the obesity epidemic. Countless longitudinal studies have found a strong link between obesity and the development of chronic, non-communicable diseases such as heart disease, stroke, diabetes, and cancer, which are the biggest killers in developed nations.

The US Department of Agriculture (USDA) and Health and Human Services (HHS) believe that unhealthy eating is one of the leading causes of the obesity epidemic. The USDA and HHS recommend as a minimum 5 servings of fruits and vegetables, 2 servings of lean meat, and 6 servings of whole grains each day. They also suggest limiting saturated fats, added sugars, and sodium.

Adopting and maintaining a regular healthy eating plan will provide the following **BENEFITS** some time in the future:

- It will improve your cardiovascular health
- It will enhance your sleep
- It will improve your psychological well-being
- It will help you lose weight.

### *Loss Concrete*

The United States currently faces a growing public health concern with the obesity epidemic. Countless longitudinal studies have found a strong link between obesity and the development of chronic, non-communicable diseases such as heart disease, stroke, diabetes, and cancer, which are the biggest killers in developed nations.

The US Department of Agriculture (USDA) and Health and Human Services (HHS) believe that unhealthy eating is one of the leading causes of the obesity epidemic. The USDA and HHS recommend as a minimum 5 servings of fruits and vegetables, 2 servings of lean meat, and 6 servings of whole grains each day. They also suggest limiting saturated fats, added sugars, and sodium.

Failing to adopt and maintain a regular healthy eating plan will lead to the following **RISKS** some time in the future:

- It will diminish your heart's functioning, preventing it from effectively pumping blood throughout your body
- It will disturb your sleep, making you feel tired and sluggish during the day
- It will cause you to feel more distressed and decreases your ability to cope with everyday stress
- It will increase your blood sugar levels in check, making you gain weight.

#### *Loss Abstract*

The United States currently faces a growing public health concern with the obesity epidemic. Countless longitudinal studies have found a strong link between obesity and the development of chronic, non-communicable diseases such as heart disease, stroke, diabetes, and cancer, which are the biggest killers in developed nations.

The US Department of Agriculture (USDA) and Health and Human Services (HHS) believe that unhealthy eating is one of the leading causes of the obesity epidemic. The USDA and HHS recommend as a minimum 5 servings of fruits and vegetables, 2 servings of lean meat, and 6 servings of whole grains each day. They also suggest limiting saturated fats, added sugars, and sodium.

Failing to adopt and maintain a regular healthy eating plan will lead to the following **RISKS** some time in the future:

- It will diminish your cardiovascular health
- It will disturb your sleep
- It will harm your psychological well-being
- It will make you gain weight

#### *Gain Proximal*

The United States currently faces a growing public health concern with the obesity epidemic. Countless longitudinal studies have found a strong link between obesity and the development of chronic, non-communicable diseases such as heart disease, stroke, diabetes, and cancer, which are the biggest killers in developed nations.

The US Department of Agriculture (USDA) and Health and Human Services (HHS) believe that unhealthy eating is one of the leading causes of the obesity epidemic. The USDA and HHS recommend as a minimum 5 servings of fruits and vegetables, 2 servings of lean meat, and 6 servings of whole grains each day. They also suggest limiting saturated fats, added sugars, and sodium.

Adopting and maintaining a regular healthy eating plan will lead to the following **IMMEDIATE BENEFITS** which may be noticeable within **WEEKS** of adherence:

- It will improve your heart's functioning
- It will help you sleep better
- It will put you in a good mood
- It will help you lose weight

#### *Gain Distal*

The United States currently faces a growing public health concern with the obesity epidemic. Countless longitudinal studies have found a strong link between obesity and the development of chronic, non-communicable diseases such as heart disease, stroke, diabetes, and cancer, which are the biggest killers in developed nations.

The US Department of Agriculture (USDA) and Health and Human Services (HHS) believe that unhealthy eating is one of the leading causes of the obesity epidemic. The USDA and HHS

recommend as minimums 5 servings of fruits and vegetables, 2 servings of lean meat, and 6 servings of whole grains each day. They also suggest limiting saturated fats, added sugars, and sodium.

Adopting and maintaining a regular healthy eating plan will lead to the following **LONG-TERM BENEFITS** which may be noticeable within **YEARS** of adherence:

- It will improve your heart's functioning
- It will help you sleep better
- It will put you in a good mood
- It will help you lose weight

#### *Loss Proximal*

The United States currently faces a growing public health concern with the obesity epidemic. Countless longitudinal studies have found a strong link between obesity and the development of chronic, non-communicable diseases such as heart disease, stroke, diabetes, and cancer, which are the biggest killers in developed nations.

The US Department of Agriculture (USDA) and Health and Human Services (HHS) believe that unhealthy eating is one of the leading causes of the obesity epidemic. The USDA and HHS recommend as minimums 5 servings of fruits and vegetables, 2 servings of lean meat, and 6 servings of whole grains each day. They also suggest limiting saturated fats, added sugars, and sodium.

Failing to adopt and maintain a regular healthy eating plan will lead to the following **IMMEDIATE RISKS**, which may be noticeable within **WEEKS** of inadherence:

- It will diminish your heart's functioning
- It will weaken your bones
- It will put you in a bad mood
- It will make you gain weight

#### *Loss Distal*

The United States currently faces a growing public health concern with the obesity epidemic. Countless longitudinal studies have found a strong link between obesity and the development of chronic, non-communicable diseases such as heart disease, stroke, diabetes, and cancer, which are the biggest killers in developed nations.

The US Department of Agriculture (USDA) and Health and Human Services (HHS) believe that unhealthy eating is one of the leading causes of the obesity epidemic. The USDA and HHS recommend as minimums 5 servings of fruits and vegetables, 2 servings of lean meat, and 6 servings of whole grains each day. They also suggest limiting saturated fats, added sugars, and sodium.

Failing to adopt and maintain a regular healthy eating plan will lead to the following **LONG-TERM RISKS**, which may be noticeable within **YEARS** of inadherence:

- It will diminish your heart's functioning
- It will weaken your bones
- It will put you in a bad mood
- It will make you gain weight

#### **GOVERNMENT AGENCY: CDC**

#### *Gain Concrete*

The United States currently faces a growing public health concern with the obesity epidemic. Countless longitudinal studies have found a strong link between obesity and the development of chronic, non-communicable diseases such as heart disease, stroke, diabetes, and cancer, which are the biggest killers in developed nations.

The Centers for Disease Control (CDC) believe that a lack of healthy eating is one of the leading causes of the obesity epidemic. The CDC recommends adults eat a variety of healthy, nutrient-dense foods across all food groups and set a calorie level that will help each individual achieve and maintain a healthy body.

Adopting and maintaining a regular healthy eating plan will provide the following **BENEFITS** some time in the future:

- It will improve your heart's functioning, allowing it to effectively pump blood throughout your body
- It will allow you to get a good night's sleep, helping you feel energized during the day
- It will make you feel happier and increases your ability to cope with everyday stress
- It will keep your blood sugar levels in check, helping you lose weight

#### *Gain Abstract*

The United States currently faces a growing public health concern with the obesity epidemic. Countless longitudinal studies have found a strong link between obesity and the development of chronic, non-communicable diseases such as heart disease, stroke, diabetes, and cancer, which are the biggest killers in developed nations.

The Centers for Disease Control (CDC) believe that a lack of healthy eating is one of the leading causes of the obesity epidemic. The CDC recommends adults eat a variety of healthy, nutrient-dense foods across all food groups and set a calorie level that will help each individual achieve and maintain a healthy body.

Adopting and maintaining a regular healthy eating plan will provide the following **BENEFITS** some time in the future:

- It will improve your cardiovascular health
- It will enhance your sleep
- It will improve your psychological well-being
- It will help you lose weight

### *Loss Concrete*

The United States currently faces a growing public health concern with the obesity epidemic. Countless longitudinal studies have found a strong link between obesity and the development of chronic, non-communicable diseases such as heart disease, stroke, diabetes, and cancer, which are the biggest killers in developed nations.

The Centers for Disease Control (CDC) believe that a lack of healthy eating is one of the leading causes of the obesity epidemic. The CDC recommends adults eat a variety of healthy, nutrient-dense foods across all food groups and set a calorie level that will help each individual achieve and maintain a healthy body.

Failing to adopt and maintain a regular healthy eating plan will lead to the following **RISKS** some time in the future:

- It will diminish your heart's functioning, preventing it from effectively pumping blood throughout your body
- It will disturb your sleep, making you feel tired and sluggish during the day
- It will cause you to feel more distressed and decreases your ability to cope with everyday stress
- It will increase your blood sugar levels in check, leading you to gain weight

### *Loss Abstract*

The United States currently faces a growing public health concern with the obesity epidemic. Countless longitudinal studies have found a strong link between obesity and the development of chronic, non-communicable diseases such as heart disease, stroke, diabetes, and cancer, which are the biggest killers in developed nations.

The Centers for Disease Control (CDC) believe that a lack of healthy eating is one of the leading causes of the obesity epidemic. The CDC recommends adults eat a variety of healthy, nutrient-dense foods across all food groups and set a calorie level that will help each individual achieve and maintain a healthy body.

Failing to adopt and maintain a regular healthy eating plan will lead to the following **RISKS** some time in the future:

- It will diminish your cardiovascular health
- It will disturb your sleep
- It will harm your psychological well-being
- It will lead you to gain weight

### *Gain Proximal*

The United States currently faces a growing public health concern with the obesity epidemic. Countless longitudinal studies have found a strong link between obesity and the development of chronic, non-communicable diseases such as heart disease, stroke, diabetes, and cancer, which are the biggest killers in developed nations.

The Centers for Disease Control (CDC) believe that a lack of healthy eating is one of the leading causes of the obesity epidemic. The CDC recommends adults eat a variety of healthy, nutrient-dense foods across all food groups and set a calorie level that will help each individual achieve and maintain a healthy body.

Adopting and maintaining a regular healthy eating plan will lead to the following **IMMEDIATE BENEFITS** which may be noticeable within **WEEKS** of adherence:

- It will improve your heart's functioning
- It will help you sleep better
- It will put you in a good mood

- It will help you lose weight

#### *Gain Distal*

The United States currently faces a growing public health concern with the obesity epidemic. Countless longitudinal studies have found a strong link between obesity and the development of chronic, non-communicable diseases such as heart disease, stroke, diabetes, and cancer, which are the biggest killers in developed nations.

The Centers for Disease Control (CDC) believe that a lack of healthy eating is one of the leading causes of the obesity epidemic. The CDC recommends adults eat a variety of healthy, nutrient-dense foods across all food groups and set a calorie level that will help each individual achieve and maintain a healthy body.

Adopting and maintaining a regular healthy eating plan will lead to the following **LONG-TERM BENEFITS** which may be noticeable within **YEARS** of adherence:

- It will improve your heart's functioning
- It will help you sleep better
- It will put you in a good mood
- It will help you lose weight

#### *Loss Proximal*

The United States currently faces a growing public health concern with the obesity epidemic. Countless longitudinal studies have found a strong link between obesity and the development of chronic, non-communicable diseases such as heart disease, stroke, diabetes, and cancer, which are the biggest killers in developed nations.

The Centers for Disease Control (CDC) believe that a lack of healthy eating is one of the leading causes of the obesity epidemic. The CDC recommends adults eat a variety of healthy, nutrient-dense foods across all food groups and set a calorie level that will help each individual achieve and maintain a healthy body.

Failing to adopt and maintain a regular healthy eating plan will lead to the following **IMMEDIATE RISKS**, which may be noticeable within **WEEKS** of inadherence:

- It will diminish your heart's functioning
- It will impair your sleep
- It will put you in a bad mood
- It will make you gain weight

#### *Loss Distal*

The United States currently faces a growing public health concern with the obesity epidemic. Countless longitudinal studies have found a strong link between obesity and the development of chronic, non-communicable diseases such as heart disease, stroke, diabetes, and cancer, which are the biggest killers in developed nations.

The Centers for Disease Control (CDC) believe that a lack of healthy eating is one of the leading causes of the obesity epidemic. The CDC recommends adults eat a variety of healthy, nutrient-dense foods across all food groups and set a calorie level that will help each individual achieve and maintain a healthy body.

Failing to adopt and maintain a regular healthy eating plan will lead to the following **LONG-TERM RISKS**, which may be noticeable within **YEARS** of inadherence:

- It will diminish your heart's functioning
- It will impair your sleep
- It will put you in a bad mood
- It will make you gain weight\_\_\_\_\_

## ADDITIONAL ANALYSES

**Table S1.** Mean reported perceived distance to when health consequences will be experienced.

| Construal Type | Level    | Frame | Mean | SD    | 95% Confidence Interval |             |
|----------------|----------|-------|------|-------|-------------------------|-------------|
|                |          |       |      |       | Lower Bound             | Upper Bound |
| Abstraction    | Abstract | Gain  | 2.90 | .917  | 2.769                   | 3.037       |
|                |          | Loss  | 2.77 | .871  | 2.642                   | 2.902       |
|                | Concrete | Gain  | 2.77 | 1.02  | 2.644                   | 2.902       |
|                |          | Loss  | 2.80 | .971  | 2.674                   | 2.931       |
| Time           | Distant  | Gain  | 2.96 | .953  | 2.828                   | 3.086       |
|                |          | Loss  | 2.90 | .1.03 | 2.768                   | 3.032       |
|                | Proximal | Gain  | 2.56 | .908  | 2.422                   | 2.687       |
|                |          | Loss  | 2.27 | .968  | 2.142                   | 2.406       |

**Table S2.** Mean percent of healthy foods chosen (SD) when BMI, AGE, GENDER are not included.

| USDA and HHS recommendations | Frame  |        |
|------------------------------|--------|--------|
|                              | Gain   | Loss   |
| Abstraction                  | 68.24  | 74.20  |
|                              | (1.72) | (1.67) |
| Time                         | 73.28  | 73.72  |
|                              | (1.72) | (1.73) |
| CDC recommendations          | Gain   | Loss   |
|                              |        |        |
| Abstraction                  | 74.21  | 71.11  |
|                              | (1.66) | (1.66) |
| Time                         | 70.63  | 73.80  |
|                              | (1.64) | (1.67) |

**Table S3.** Model parameters when predicting percent of healthy options chosen in a model excluding covariates.

|                                                              | Type III Sum of Squares | df | Mean Square | <i>F</i> | <i>p</i> | $\eta_p^2$ |
|--------------------------------------------------------------|-------------------------|----|-------------|----------|----------|------------|
| Construal Type                                               | 346.21                  | 1  | 346.21      | .59      | .441     | .000       |
| Level                                                        | 460.02                  | 1  | 460.02      | .79      | .375     | .000       |
| Gain/Loss Frame                                              | 1075.03                 | 1  | 1075.03     | 1.84     | .175     | .001       |
| Government Agency                                            | 2.35                    | 1  | 2.35        | .004     | .949     | .000       |
| Construal Type X Level                                       | 4169.89                 | 1  | 4169.89     | 7.15     | .008     | .004       |
| Construal Type X Gain/Loss Frame                             | 14.40                   | 1  | 14.40       | .03      | .875     | .000       |
| Construal Type X Government Agency                           | 764.54                  | 1  | 764.54      | 1.31     | .252     | .001       |
| Level X Gain/Loss Frame                                      | 163.09                  | 1  | 163.09      | .28      | .597     | .000       |
| Level X Government Agency                                    | 84.98                   | 1  | 84.98       | .15      | .703     | .000       |
| Gain/Loss Frame X Government Agency                          | 1027.60                 | 1  | 1027.60     | 1.76     | .184     | .001       |
| Construal Type X Level X Gain/Loss Frame                     | 938.77                  | 1  | 938.77      | 1.61     | .205     | .001       |
| Construal Type X Level X Government Agency                   | 508.93                  | 1  | 508.93      | .87      | .350     | .001       |
| Construal Type X Gain/Loss Frame X Government Agency         | 3560.13                 | 1  | 3560.13     | 6.11     | .014     | .004       |
| Level X Gain/Loss Frame X Government Agency                  | 420.74                  | 1  | 420.74      | .72      | .396     | .000       |
| Construal Type X Level X Gain/Loss Frame X Government Agency | 261.52                  | 1  | 261.52      | .45      | .503     | .000       |



**Table S4.** Model parameters when predicting percent of healthy options chosen in a model including covariates of age, gender, and BMI.

|                                                              | Type III Sum of Squares | df | Mean Square | <i>F</i> | <i>p</i> | $\eta_p^2$ |
|--------------------------------------------------------------|-------------------------|----|-------------|----------|----------|------------|
| Age                                                          | 29747.10                | 1  | 29747.10    | 53.47    | .000     | .032       |
| Gender                                                       | 7287.48                 | 1  | 7287.48     | 13.10    | .000     | .008       |
| BMI                                                          | 9295.55                 | 1  | 9295.55     | 16.71    | .000     | .010       |
| Construal Type                                               | 124.40                  | 1  | 124.40      | .22      | .636     | .000       |
| Level                                                        | 676.86                  | 1  | 676.86      | 1.22     | .270     | .001       |
| Gain/Loss Frame                                              | 1271.11                 | 1  | 1271.11     | 2.29     | .131     | .001       |
| Government Agency                                            | 14.37                   | 1  | 14.37       | .03      | .872     | .000       |
| Construal Type X Level                                       | 3826.22                 | 1  | 3826.22     | 6.88     | .009     | .004       |
| Construal Type X Gain/Loss Frame                             | 17.51                   | 1  | 17.51       | .03      | .859     | .000       |
| Construal Type X Government Agency                           | 680.12                  | 1  | 680.12      | 1.33     | .269     | .001       |
| Level X Gain/Loss Frame                                      | 124.12                  | 1  | 124.12      | .22      | .67      | .000       |
| Level X Government Agency                                    | 85.66                   | 1  | 85.66       | .15      | .695     | .000       |
| Gain/Loss Frame X Government Agency                          | 541.74                  | 1  | 541.74      | .97      | .324     | .001       |
| Construal Type X Level X Gain/Loss Frame                     | 1055.42                 | 1  | 1055.42     | 1.90     | .169     | .001       |
| Construal Type X Level X Government Agency                   | 615.58                  | 1  | 615.58      | 1.11     | .293     | .001       |
| Construal Type X Gain/Loss Frame X Government Agency         | 3355.24                 | 1  | 3355.24     | 6.03     | .014     | .004       |
| Level X Gain/Loss Frame X Government Agency                  | .01                     | 1  | .01         | .00      | .997     | .000       |
| Construal Type X Level X Gain/Loss Frame X Government Agency | 358.36                  | 1  | 358.36      | .64      | .422     | .000       |
